# Supplementary material
Source: MDPI journal article supplement (https://www.mdpi.com/2077-0472/11/9/887)
Supplement: s1 [file s1]

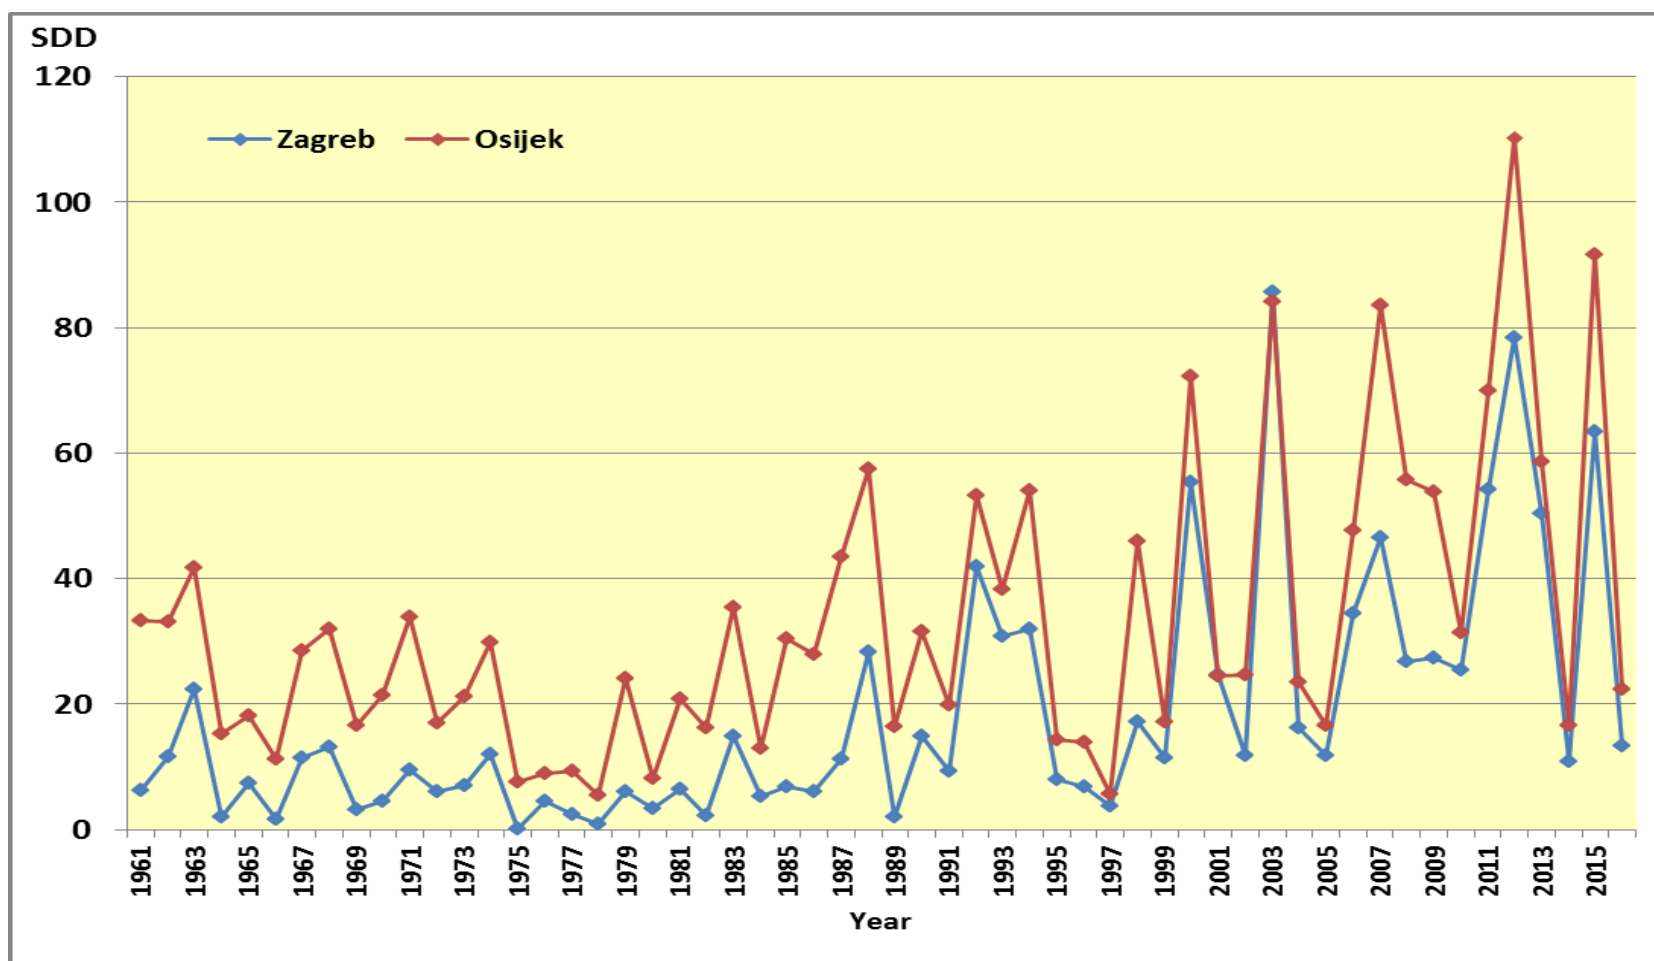

**Supplementary Figure S1.** Stress Degree Days (SDD) (Idso et al., 1981) for Zagreb (N 45.813; E 16.000) and Osijek (N 45.539 E 18.735) in Croatia in the period from 1961 to 2016

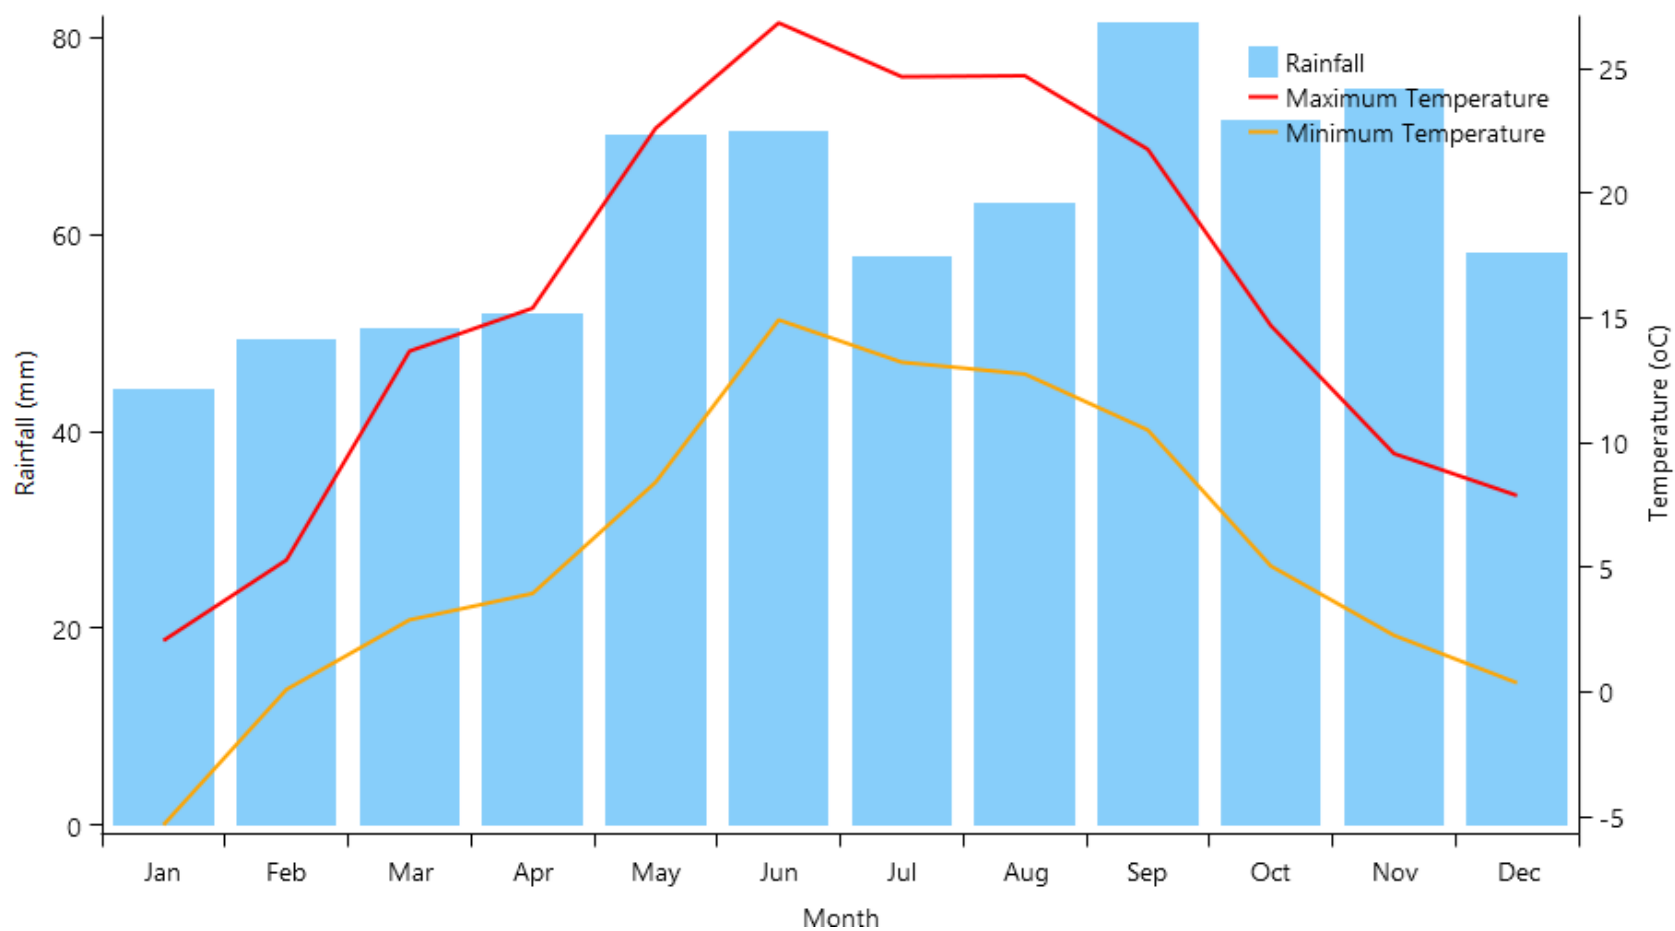

**Supplementary Figure S2.** Long term average climate data (1979-2019) for Rugvica near Zagreb, Croatia (N 45.6879; E 16.3094)

**Supplementary Table S1.** An overview of the field trials grown in Rugvica, Croatia (N 45.688; E 16.309) in the period 1996-2015 with number of entries (NoE), the annual means for grain yield (t/ha) and respective standard error (SE), and total mean with respective pooled error

| Year              | FAO 200 |                  | FAO 300 |                  | FAO 400 |                  | FAO 500 |                   | FAO 600 |                  |
|-------------------|---------|------------------|---------|------------------|---------|------------------|---------|-------------------|---------|------------------|
|                   | NoE     | Mean±SE          | NoE     | Mean±SE          | NoE     | Mean±SE          | NoE     | Mean±SE           | NoE     | Mean±SE          |
| 1996              | 50      | 10.83±0.26       | 48      | 11.55±0.14       | 75      | 10.08±0.16       | 50      | 10.06±0.18        | 24      | 10.08±0.20       |
| 1997              | 50      | 9.92±0.28        | 50      | 10.73±0.28       | 72      | 11.02±0.17       | 48      | 12.19±0.25        | 24      | 11.66±0.28       |
| 1998              | 50      | 10.37±0.17       | 50      | 7.88±0.13        | 75      | 11.72±0.14       | 50      | 10.14±0.13        | 25      | 8.24±0.17        |
| 1999              | 50      | 9.69±0.19        | 50      | 12.60±0.15       | 75      | 11.55±0.13       | 50      | 11.03±0.19        | 25      | 10.88±0.27       |
| 2000              | 50      | 8.67±0.17        | 50      | 8.92±0.18        | 25      | 9.65±0.22        | 50      | 10.87±0.15        | 25      | 9.19±0.29        |
| 2001              | 46      | 10.46±0.23       | 63      | 11.33±0.22       | 107     | 11.26±0.14       | 63      | 10.04±0.16        | 40      | 11.32±0.23       |
| 2002              | 50      | 9.76±0.12        | 66      | 10.39±0.20       | 107     | 10.04±0.15       | 66      | 10.28±0.16        | 41      | 10.95±0.19       |
| 2003              | 23      | 7.10±0.19        | 36      | 6.60±0.15        | 49      | 7.73±0.15        | 37      | 8.15±0.14         | 31      | 7.98±0.20        |
| 2004              | 25      | 10.60±0.30       | 41      | 10.49±0.23       | 57      | 9.41±0.32        | 41      | 10.77±0.23        | 41      | 10.14±0.15       |
| 2005              | 24      | 9.94±0.26        | 40      | 9.06±0.20        | 41      | 8.30±0.24        | 55      | 9.64±0.19         | 38      | 7.46±0.23        |
| 2006              | 25      | 9.91±0.22        | 41      | 9.41±0.16        | 41      | 9.12±0.19        | 56      | 9.49±0.13         | 39      | 9.40±0.15        |
| 2007              | 25      | 11.44±0.16       | 41      | 12.01±0.20       | 39      | 12.16±0.22       | 40      | 12.10±0.17        | 57      | 11.68±0.17       |
| 2008              | 25      | 9.01±0.22        | 41      | 8.29±0.18        | 57      | 8.35±0.13        | 41      | 8.65±0.12         | 41      | 8.26±0.11        |
| 2009              | 25      | 9.11±0.36        | 41      | 10.76±0.18       | 41      | 9.98±0.21        | 57      | 10.78±0.12        | 41      | 10.85±0.23       |
| 2010              | 25      | 9.54±0.25        | 41      | 9.13±0.18        | 41      | 9.64±0.15        | 57      | 9.42±0.10         | 66      | 9.37±0.11        |
| 2011              | 25      | 6.40±0.22        | 41      | 8.26±0.21        | 41      | 8.82±0.20        | 82      | 9.12±0.14         | 41      | 10.13±0.15       |
| 2012              | 25      | 10.13±0.24       | 41      | 10.23±0.20       | 41      | 9.46±0.23        | 82      | 9.64±0.11         | 41      | 9.13±0.15        |
| 2013              | 25      | 8.29±0.27        | 41      | 8.18±0.17        | 82      | 8.72±0.09        | 41      | 8.29±0.14         | 41      | 8.15±0.16        |
| 2014              | 25      | 11.42±0.32       | 41      | 11.38±0.29       | 98      | 10.93±0.16       | 41      | 12.15±0.23        | 41      | 11.86±0.22       |
| 2015              | 25      | 7.16±0.20        | 41      | 7.54±0.14        | 66      | 8.41±0.10        | 16      | 8.45±0.26         | 16      | 8.90±0.18        |
| <b>Total mean</b> |         | <b>9.49±0.23</b> |         | <b>9.74±0.19</b> |         | <b>9.82±0.18</b> |         | <b>10.06±0.16</b> |         | <b>9.78±0.19</b> |

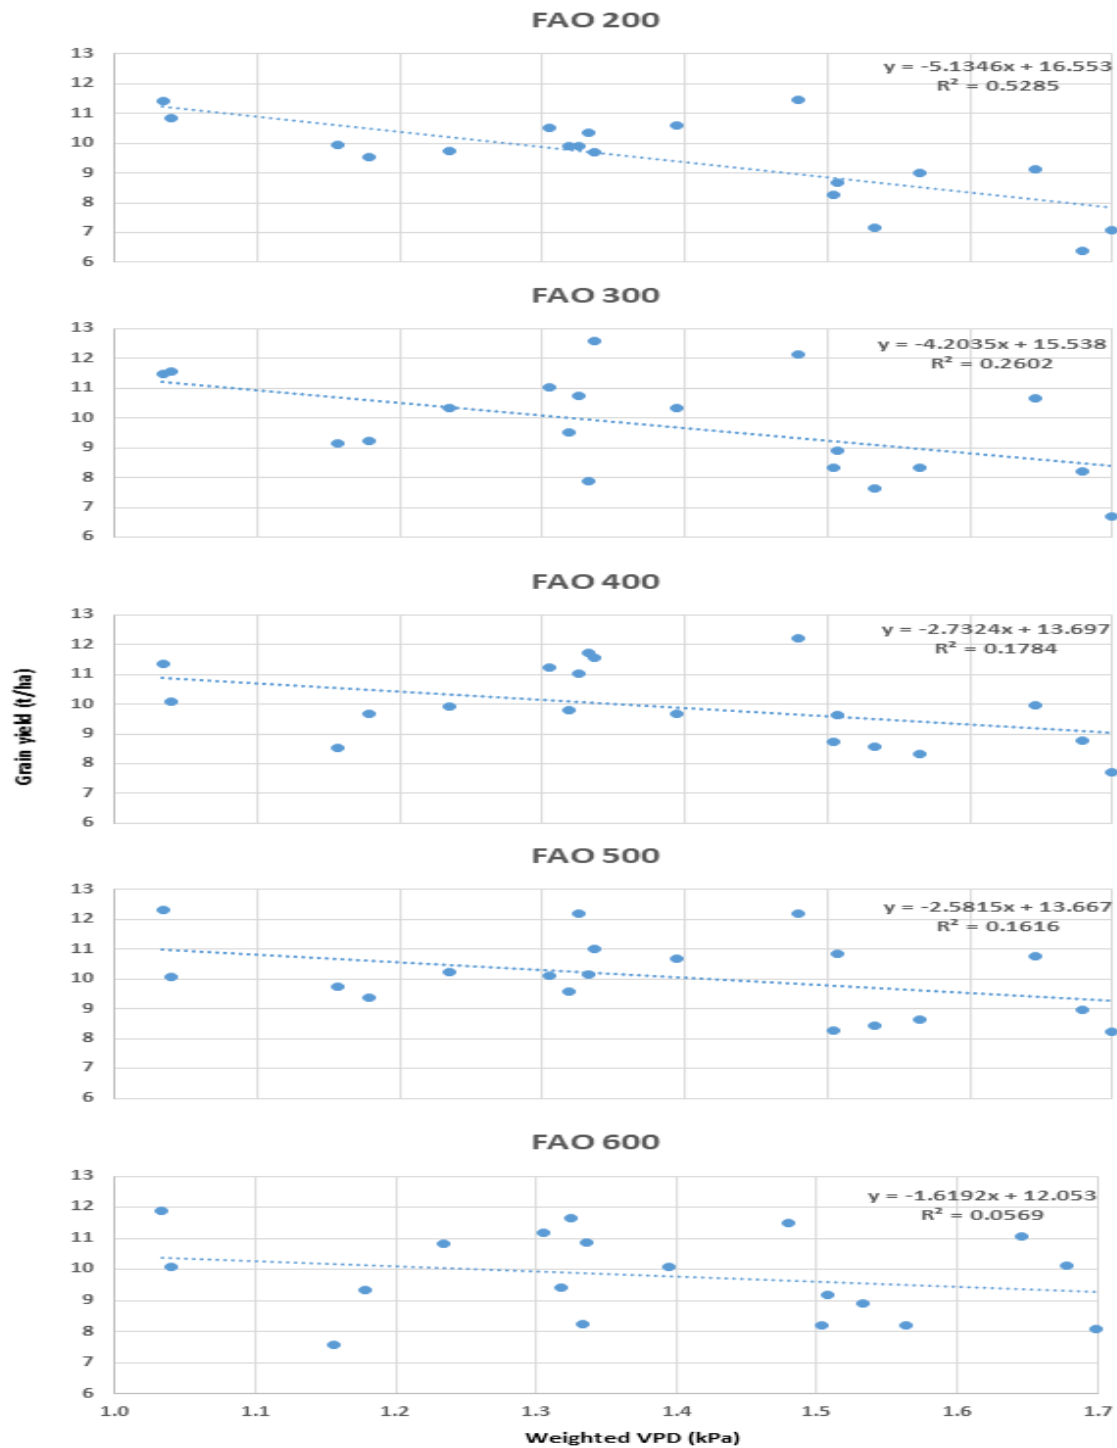

**Supplementary Figure S3.** Relationship between grain yield and weighted vapor pressure deficit (VPD) across five maturity groups (FAO 200 – FAO 600) in the experiment during the period of 1996 to 2015
